# Supplementary material for: Eco-Friendly Synthesis of Functionalized Carbon Nanodots from Cashew Nut Skin Waste for Bioimaging
Source: MDPI journal article supplement (doi:10.3390/catal13030547), 2023-03-09
Supplement: s1 [file s1]

Archive with 1 entries (1 files):
- catalysts-2153537-supplementary.pdf
